# Supplementary material for: Deuterium isotope effects in the polyatomic reaction of O(1D2) + CH4 → OH + CH3
Source: Royal Society of Chemistry journal article supplement (doi:10.1039/c3cp51680f), 2013-01-01
Supplement: c3cp51680f.pdf [file c3cp51680f.pdf]

ESI1.

Table of the energetic relation of the products (kcal/mol).

|                                      | Collision energy | Average of OH/OD internal energy |          |          |                              | COM translational energy release |          |          |                              |
|--------------------------------------|------------------|----------------------------------|----------|----------|------------------------------|----------------------------------|----------|----------|------------------------------|
|                                      |                  | Insertion                        |          |          | Abstraction<br>(whole angle) | Insertion                        |          |          | Abstraction<br>(whole angle) |
|                                      |                  | Forward                          | Sideways | Backward |                              | Forward                          | Sideways | Backward |                              |
| CH <sub>3</sub> (v=0)                | 0.9              | 28                               | 31       | 28       | 38                           | 16                               | 13       | 16       | 6                            |
|                                      | 1.2              | 29                               | 33       | 28       | 38                           | 15                               | 11       | 16       | 6                            |
|                                      | 1.6              | 28                               | 33       | 26       | 37                           | 17                               | 11       | 18       | 7                            |
|                                      | 3.6              | 32                               | 36       | 32       | 36                           | 15                               | 10       | 14       | 11                           |
|                                      | 3.7              | 31                               | 36       | 35       | 35                           | 15                               | 10       | 12       | 12                           |
|                                      | 3.9              | 32                               | 37       | 35       | 35                           | 15                               | 10       | 12       | 12                           |
|                                      | 4.3              | 32                               | 37       | 34       | 35                           | 15                               | 10       | 13       | 13                           |
|                                      | 6.4              | 34                               | 37       | 33       | 34                           | 16                               | 12       | 16       | 15                           |
| CD <sub>3</sub> (v=0)                | 1.0              | 29                               | 29       | 23       | 36                           | 14                               | 15       | 21       | 8                            |
|                                      | 1.3              | 30                               | 30       | 24       | 35                           | 14                               | 13       | 20       | 9                            |
|                                      | 1.8              | 30                               | 32       | 25       | 36                           | 14                               | 13       | 19       | 8                            |
|                                      | 3.8              | 33                               | 35       | 28       | 35                           | 14                               | 12       | 18       | 12                           |
|                                      | 3.9              | 33                               | 34       | 27       | 35                           | 14                               | 12       | 19       | 12                           |
|                                      | 4.2              | 32                               | 35       | 28       | 35                           | 14                               | 12       | 19       | 12                           |
|                                      | 4.7              | 33                               | 36       | 29       | 35                           | 14                               | 12       | 18       | 13                           |
|                                      | 6.8              | 35                               | 37       | 30       | 35                           | 14                               | 12       | 19       | 15                           |
| CH <sub>3</sub> (v <sub>1</sub> =1)  | 1.6              | 22                               | 27       | 22       |                              | 14                               | 9        | 14       |                              |
|                                      | 3.7              | 24                               | 29       | 24       |                              | 14                               | 9        | 14       |                              |
|                                      | 6.4              | 26                               | 30       | 25       |                              | 15                               | 10       | 15       |                              |
| CD <sub>3</sub> (v <sub>1</sub> = 1) | 1.8              | 27                               | 28       | 21       |                              | 11                               | 11       | 18       |                              |
|                                      | 3.8              | 29                               | 29       | 23       |                              | 12                               | 11       | 18       |                              |
|                                      | 6.8              | 30                               | 31       | 25       |                              | 14                               | 12       | 18       |                              |
